# Supplementary material
Source: PubMed Central journal article supplement (PMC6450116)
Supplement: JVI.02302-18-s0001.pdf [file JVI.02302-18-s0001.pdf]

Fig S1

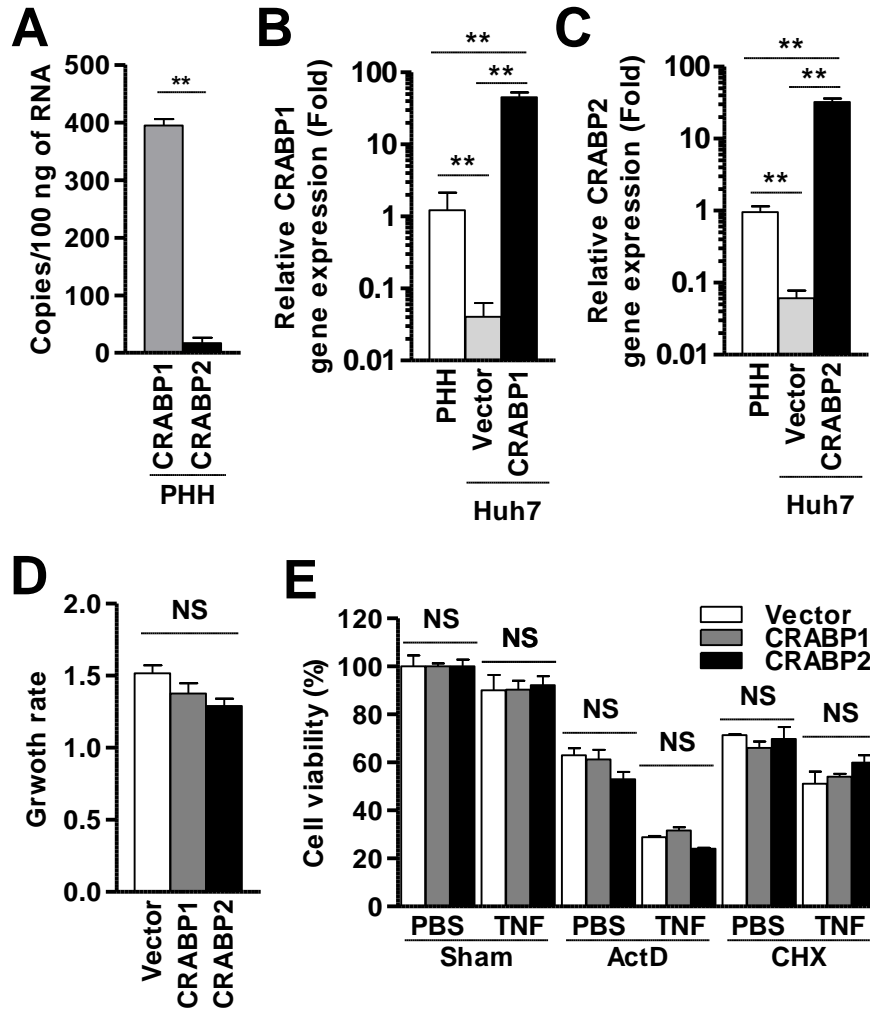

**Fig S1. Expression of CRABPs on PHH and Huh7.** (A) Total RNA extracted from PHH (n=3) were used for RT-qPCR analysis for the assessment of CRABP1 and 2 gene abundances. \*\*p<0.01. (B-C) Total RNA extracted from PHH (n=3) and Huh7 cells stably expressing FLAG-tagged CRABPs were used for RT-qPCR analysis for the assessment of CRABP1 (B) and 2 (C) genes relative expression. \*\*p<0.01. (D) Huh7 cells stably expressing FLAG-tagged CRABPs were cultured for 72 hours followed by the assessment of cellular proliferation every 24 hours. The growth rate was determined by the average cell viability. (E) Huh7 cells stably expressing FLAG-tagged CRABPs were treated with TNF in the absence or presence of ActD or CHX for 24 hours followed by the cell viability assessment. NS: Not Significant.

Fig S2

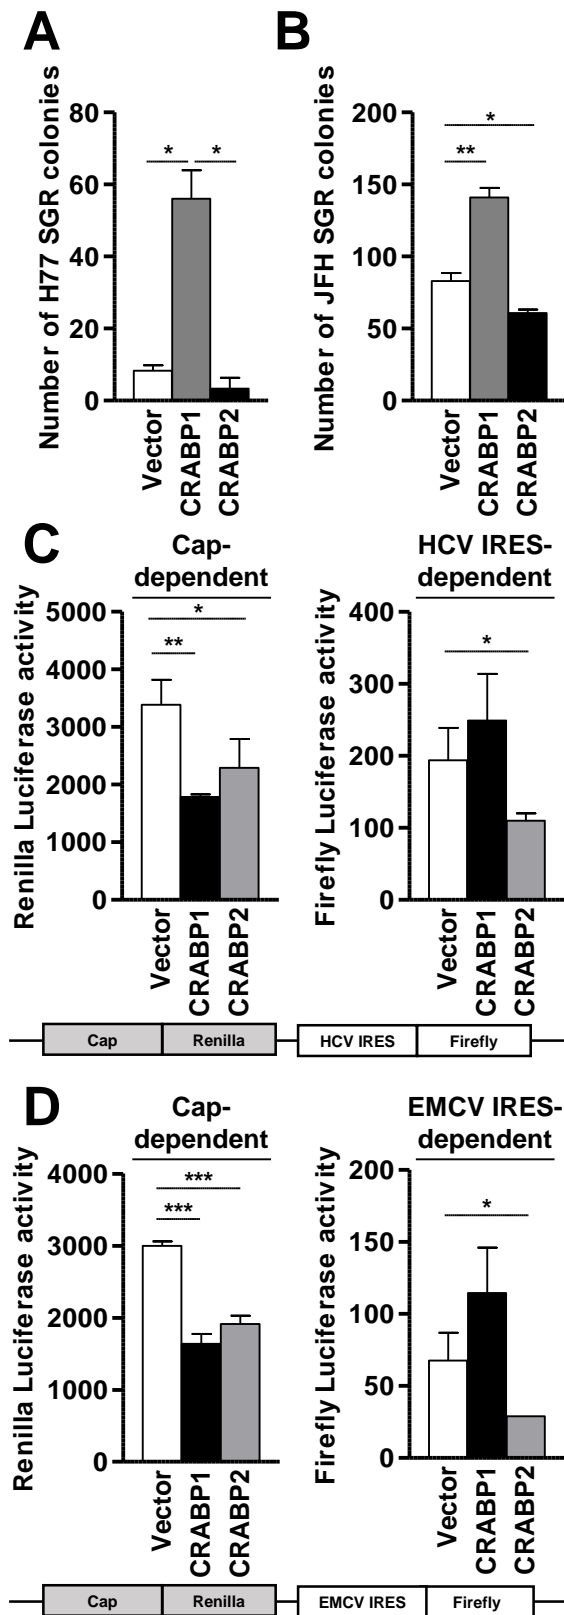

**Fig S2. CRABPs regulation of IRES-dependent translation. (A-B)** Huh7 cells stably expressing CRABPs were electroporated with in vitro transcribed HCV subgenomic replicon (SGR) genome (GT1a H77(A) and GT2a JFH1 (B)) followed by G418 selection for 3 weeks prior to the crystal violet staining. The graph indicates the number of SGR-containing colony numbers per 100mm tissue culture dish. \* $p < 0.05$  and \*\* $p < 0.01$  **(C-D)** Huh7 cells stably expressing CRABPs were transfected with the bicistronic vector encoding cap-dependent Renilla and HCV IRES-dependent firefly luciferase as indicated in the diagram under the bar graph. Cap-dependent protein translation (Left panel) or IRES-dependent protein translation (Right panel) were assessed by the Renilla or HCV IRES-dependent firefly luciferase activity, respectively (C) or by the Renilla or EMCV IRES-dependent firefly luciferase activity (D). \* $p < 0.05$ , \*\* $p < 0.01$  and \*\*\* $p < 0.001$

Fig S3

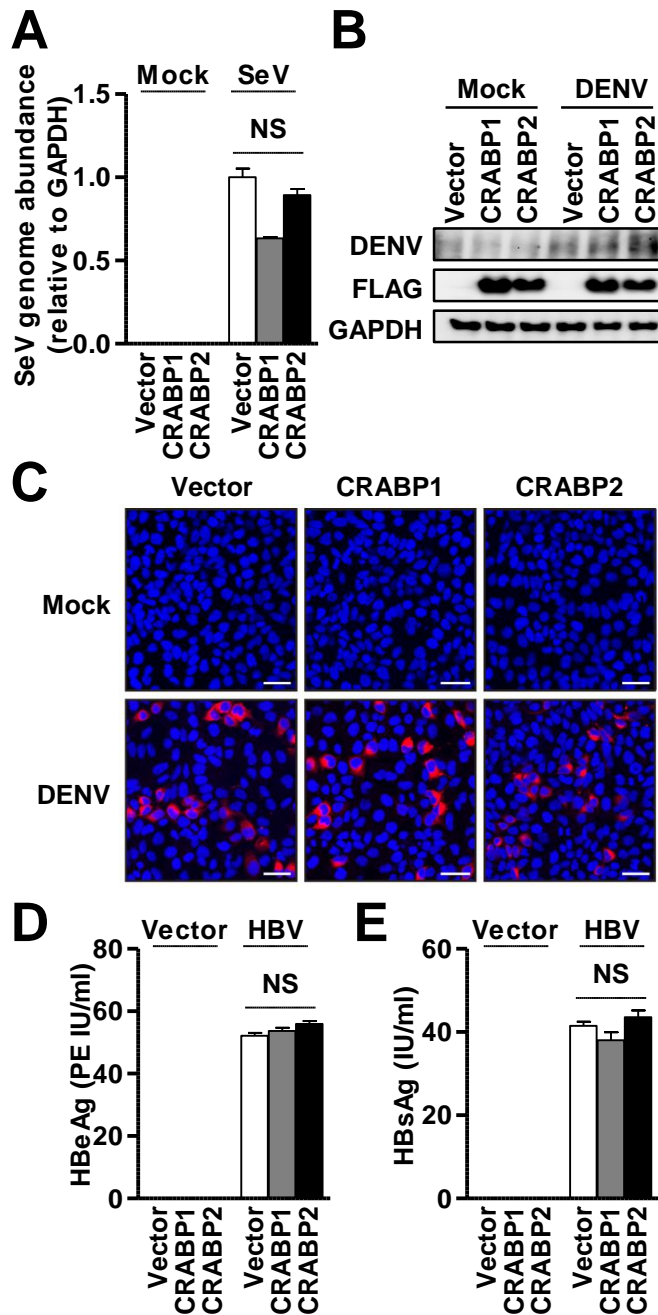

**Fig S3.** CRABPs regulation of viral infection. **(A)** Cell lysates from Huh7 cells stably expressing CRABPs infected with SeV at 100 HAU/ml for 24 hours were subjected to assessment of viral genome abundance via RT-qPCR. **(B-C)** Cell lysates from Huh7 cells stably expressing CRABPs infected with DENV at MOI 0.2 for 72 hours were subjected to immunoblotting analysis for the detection of DENV (B) and the cells were stained with DENV (red), and DAPI (blue) at 48 hours after DENV infection (C). Scale bar 50µm. **(D-E)** Huh7 cells stably expressing CRABPs were transfected with p1.3x HBV DNA encoding plasmid (HBV) or control vector (Vector;pUC19) for 48 hours, followed by ELISA for the detection of HBV e-antigen (HBeAg) (D) and hepatitis B s-antigen (HBsAg) (E) in the culture supernatants. NS: Not significant.

Fig S4

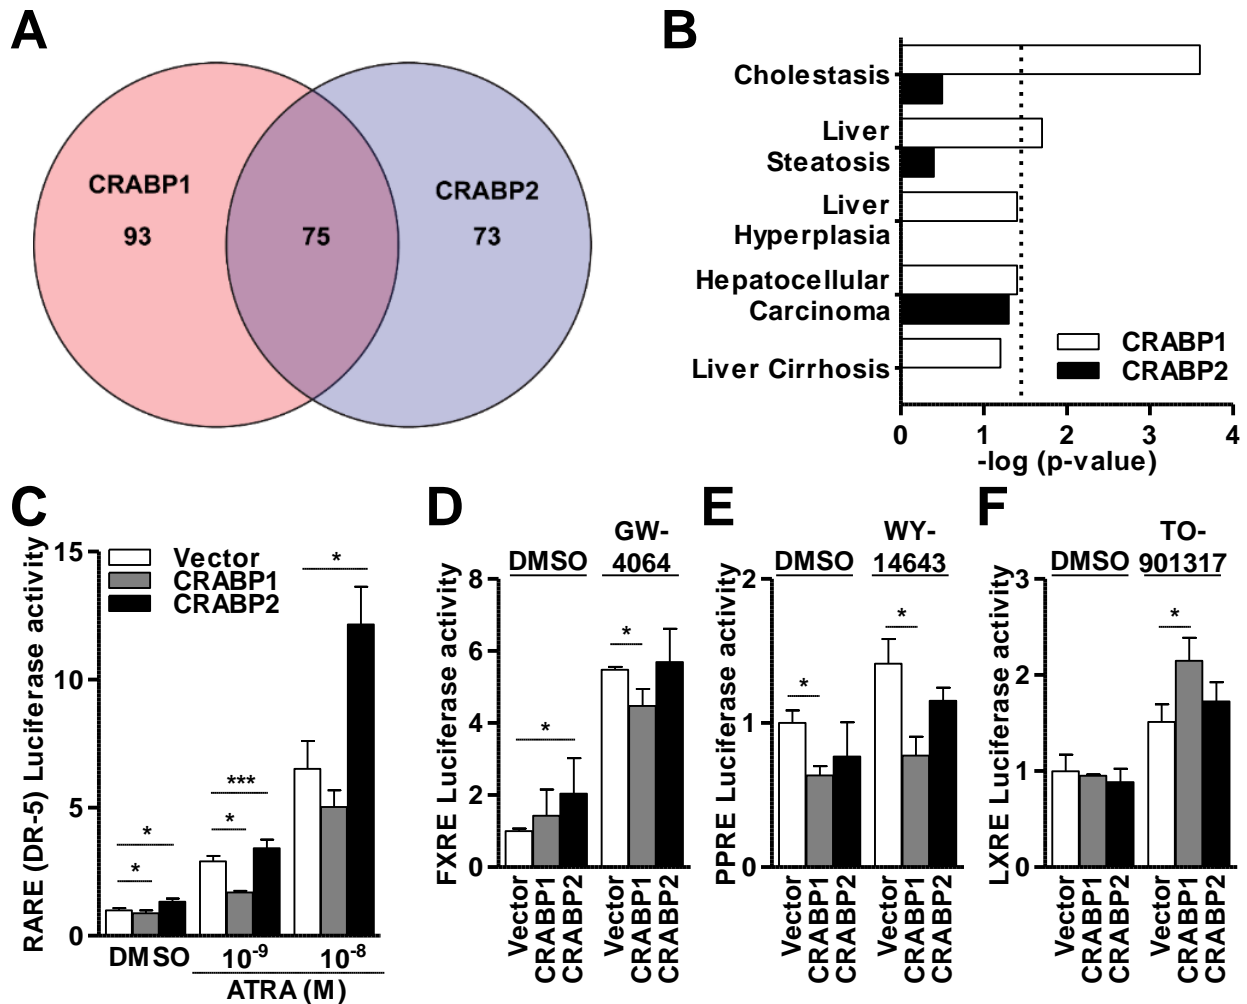

**Fig S4. Cellular response to CRABPs expression.** (A) Venn diagram demonstrates the number of differentially expressed genes in CRABP1 or 2-expressing Huh7 cells that were determined by the mRNA sequencing analysis shown in Fig 4A. (B) The uniquely and differentially expressed genes in Huh7-CRABP1 or 2 cells were analyzed for the disease association using IPA software. The dotted line indicates the statistical significance threshold. (C-F) Huh7 cells stably expressing CRABPs were co-transfected with firefly (FF) luciferase reporter construct that is regulated by indicated nuclear receptors along with CMV promoter regulated Renilla luciferase (RL) expression plasmid. 24 hours after the transfection, the cells were treated with the indicated agonists for 24 hours, followed by Dual Luciferase assay. RLU was calculated by the ratio of FF/RL. Agonists: ATRA (1 $\mu$ M) for RARE agonist (C), GW4064 (10 $\mu$ M) for FXRE agonist (D), WY-14643 (100 $\mu$ M) for PPRE agonist (E), and TO901317 (10 $\mu$ M) for LXRE agonist (F). \* $p$ <0.05 and \*\*\* $p$ <0.001

Fig S5

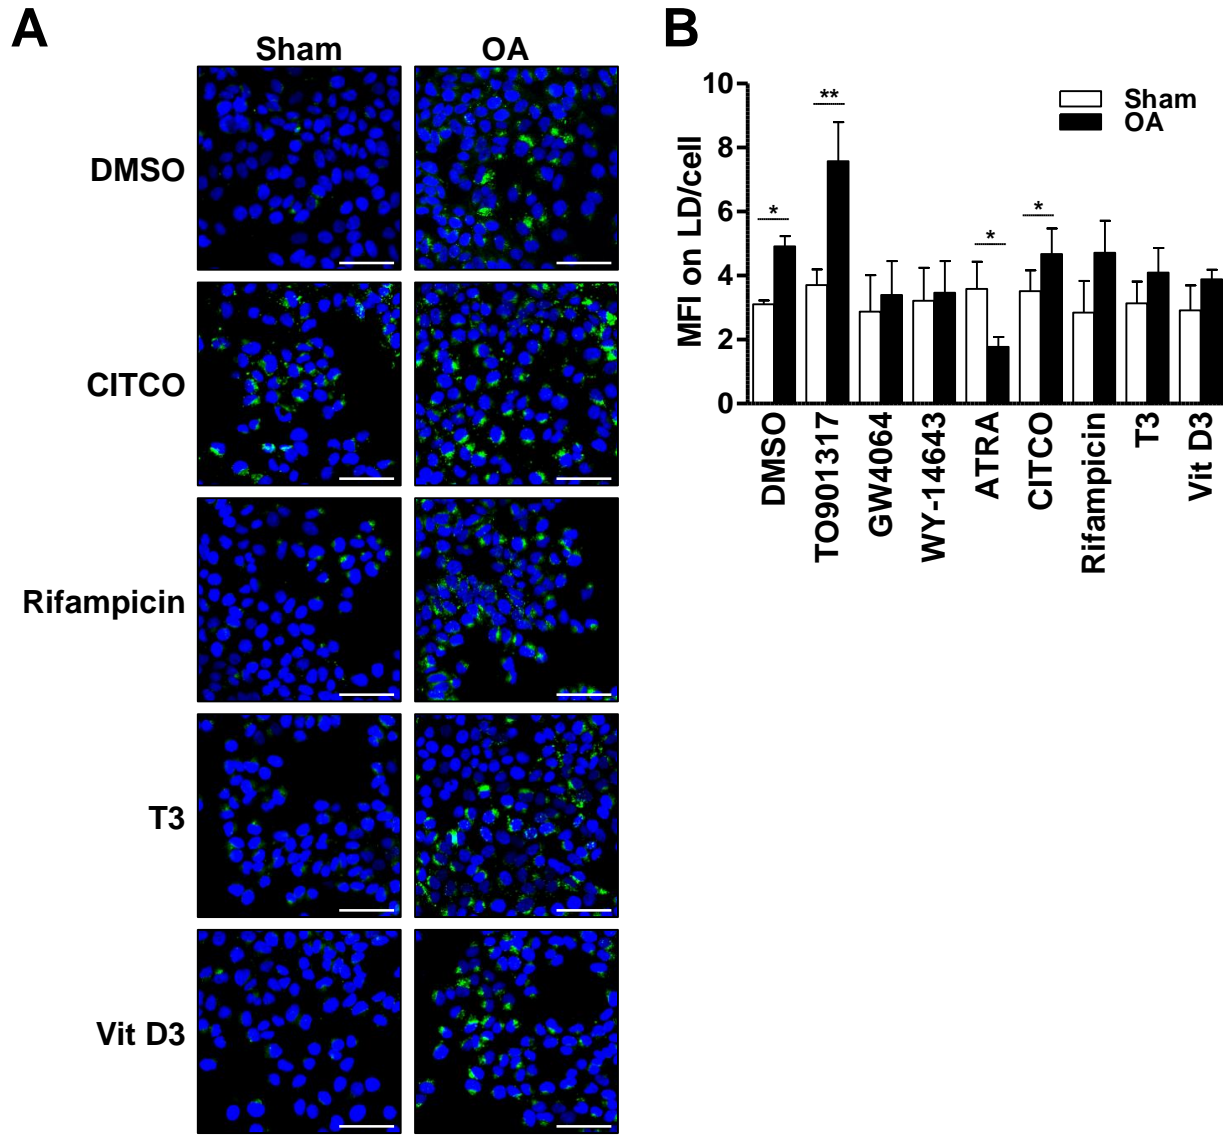

**Fig S5. Nuclear receptor pathway regulation of LD abundance. (A)** Huh7 cells were cultured with indicated nuclear receptor agonists (CAR: CITCO (10 $\mu$ M), PXR: Rifampicin (10 $\mu$ M), TR: T3 (1 $\mu$ M), VDR: Vit D3 (0.1 $\mu$ M)) for 72 hours in the presence of OA (50 $\mu$ M) followed by BODIPY (green) and DAPI staining for the fluorescence microscopic analysis. Scale bar 100 $\mu$ m. **(B)** The abundance of LD in the NR ligands treated cells were quantified as median fluorescence intensity (MFI) of 100 representative cells. The treatment condition for the each ligand is described in Fig 5D and S5A.

Fig S6

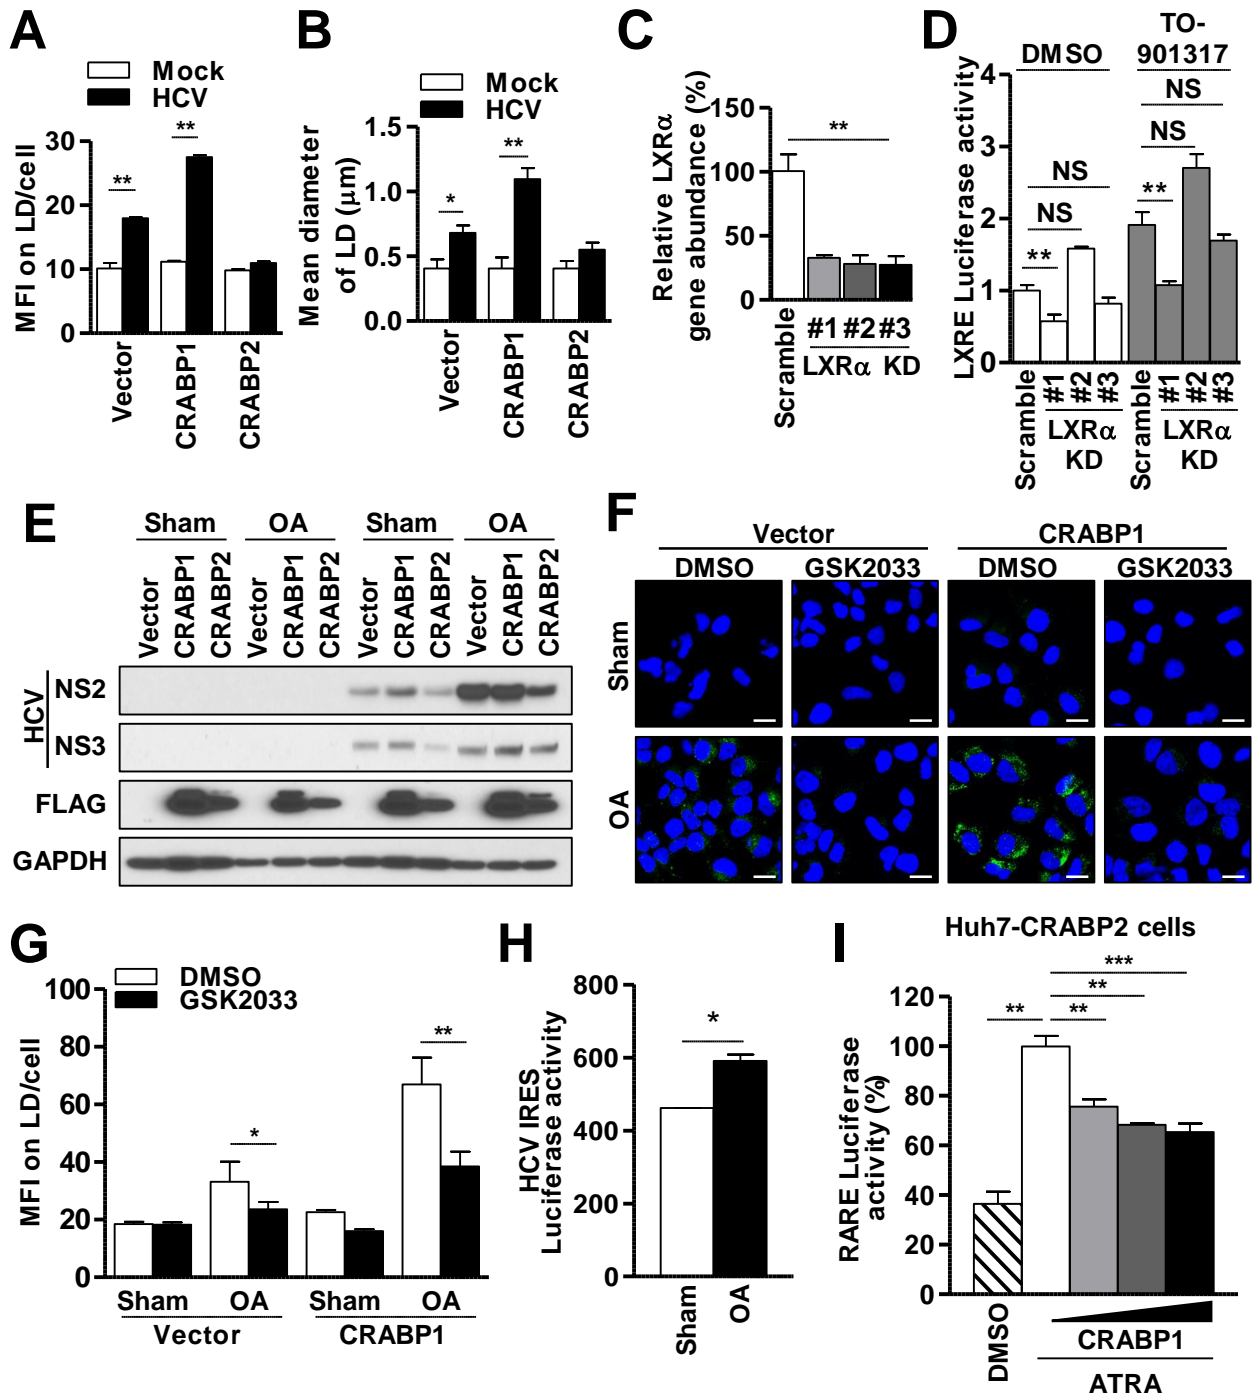

**Fig S6. FFA regulation of HCV infection. (A-B)** Huh7 cells stably expressing CRABPs were infected with HCV for 48 hours at MOI 0.1. Then, cells were stained with BODIPY (green), and DAPI (blue) to evaluate the size and abundance of LD in both uninfected and infected cells. The fluorescent microscopic image of 20 representative cells was used for the analysis of mean fluorescent intensity (MFI) per cell (A) and the mean diameter of LD (B). \* $p < 0.05$  and \*\* $p < 0.01$ . **(C)** Huh7 cells stably expressing shRNA scramble or LXR- $\alpha$  (clone #1, 2, and 3) were subjected to RT-qPCR analysis of LXR- $\alpha$  gene abundance. The relative abundance was normalized by GAPDH and shown in % reduction to the scramble shRNA expressing cells. **(D)** LXRE-Luc plasmid along with CMV-promoter driven renilla luciferase plasmid were transfected to Huh7 cells stably expressing shRNA scramble or LXR- $\alpha$  (clone #1, 2, and 3) followed by LXR-agonist (10 $\mu$ M) treatment for 24 hours. Then cell lysates were subjected to dual luciferase assay. **(E)** Huh7 cells stably expressing CRABPs were pretreated with OA (100 $\mu$ M) for 24 hours, followed by HCV infection (MOI 0.1) for 48 hours. Cell lysates were subjected to immunoblotting analysis for the detection of the indicated proteins. **(F-G)** Huh7 cells stably expressing CRABPs were pretreated with GSK2033 for 24 hours, followed by OA (50 $\mu$ M) treatment for 24 hours. The cells were stained with LD with BODIPY (green), and DAPI (blue) to evaluate LD formation. Scale bar 20 $\mu$ m (F). The abundance and size of LD in CRABP1-expressing cells were quantified as median fluorescence intensity (MFI) and diameter of LD in 20 representative cells (G). \* $p < 0.05$  and \*\* $p < 0.01$  **(H)** Huh7 cells transfected with bicistronic luciferase reporter plasmid (Cap-dependent Renilla- and HCV IRES-dependent firefly luciferase protein translation) for 16 hours followed by OA (100 $\mu$ M) treatment for an additional 48 hours. Cell lysates were subjected to dual-luciferase assay. HCV-IRES activity was determined by the normalization of Firefly luciferase activity with Renilla luciferase activity. \* $p < 0.05$ . **(I)** CRABP2-expressing Huh7 cells were co-transfected with increasing amount of CRABP1 expression plasmid (0, 25, 50, 100 ng), RARE luciferase plasmid, and Renilla luciferase reporter plasmids for 8 hours followed by ATRA (0.01 $\mu$ M) treatment for 40 hours. The cell lysates were subjected to dual luciferase assay for the assessment of RAR-RXR activity. \*\* $p < 0.01$  and \*\*\* $p < 0.001$ .

Fig S7

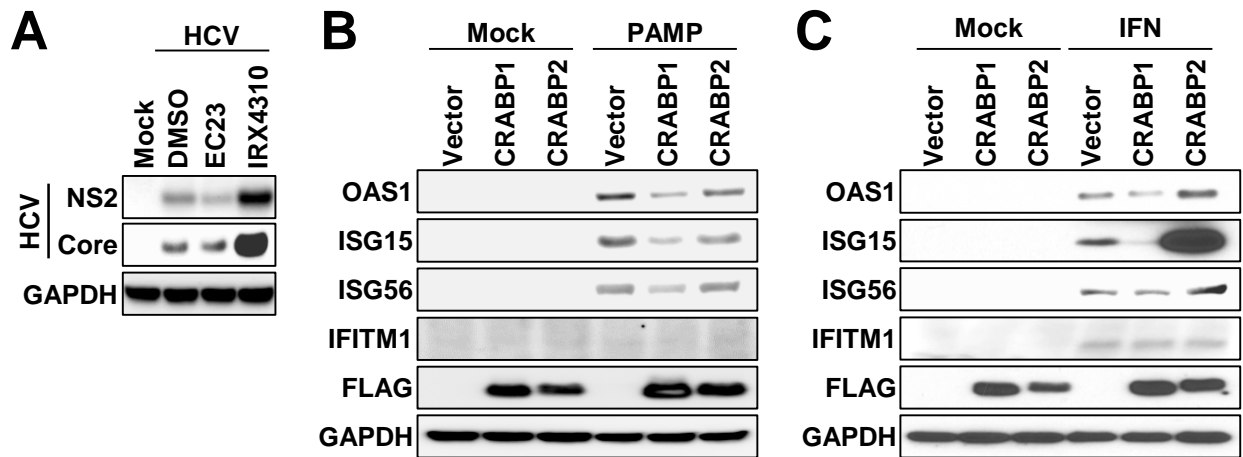

**Fig S7. RAR-RXR pathway regulation of HCV. (A)** Huh7 cells were treated with synthetic RAR agonist (EC23, 1 μM) or RAR antagonist (IRX4310, 1 μM) for 72 hours, followed by HCV infection at MOI 0.1 for 48 hours. Cell lysates were subjected to immunoblotting analysis for the abundance assessment of the indicated proteins. **(B-C)** Huh7 cells stably expressing CRABPs were either transfected with HCV PAMP (B) or treated with IFNβ (C) for 24 hours followed by immunoblotting analysis for the detection of the indicated proteins.



**Table S1. List of genes uniquely regulated by the expression of CRABP1**

| <b>Huh7- CRABP1</b> |             |          |
|---------------------|-------------|----------|
| <b>Up</b>           | <b>Down</b> |          |
| ADAMTS12            | A1BG        | KYNU     |
| ADAMTS9             | ABCC3       | LAMP3    |
| AMOT                | ABHD17C     | LBP      |
| B4GALNT4            | AKR1B10     | LGALS3BP |
| COL26A1             | ALDH3B1     | MAN2C1   |
| COLGALT2            | ALDH8A1     | MICALL2  |
| DUSP4               | ALS2CL      | MMP23B   |
| FGFR1               | ANKDD1A     | MOGAT3   |
| FSCN1               | ANKRD23     | MST1     |
| IL1RN               | ANO7        | MST1L    |
| LINGO1              | ARAP3       | MST1P2   |
| LIPG                | ATG16L2     | NEURL1B  |
| LPAR1               | BTBD8       | NGEF     |
| LSR                 | CASP1       | PAQR6    |
| LYPD6B              | CCDC88B     | PARP11   |
| MTCL1               | CD47        | PGC      |
| NFIC                | CD68        | PI3      |
| NTS                 | CIDEC       | PLIN5    |
| SLC25A18            | CPT1B       | PNPO     |
| TNFSF4              | DBH         | PRKCZ    |
| UNC5B               | DZIP1       | RCN3     |
|                     | EFHD1       | RIMKLA   |
|                     | FOXG1       | SHANK3   |
|                     | FSIP2       | SIMC1    |
|                     | GABRG2      | SLC2A9   |
|                     | GBA3        | SLC5A9   |
|                     | GOLGA8IP    | SPTBN5   |
|                     | GOLGA8S     | TENM1    |
|                     | GPHN        | TJP3     |
|                     | GSTA1       | TNFSF11  |
|                     | HK1         | TYMSOS   |
|                     | HKDC1       | WISP3    |
|                     | IFT27       | YJEFN3   |
|                     | IL22RA1     | ZNF175   |
|                     | KLHL26      | ZNF337   |

**Table S2. List of genes uniquely regulated by the expression of CRABP2**

| <b>Huh7- CRABP2</b> |          |             |
|---------------------|----------|-------------|
| <b>Up</b>           |          | <b>Down</b> |
| CCDC110             | PSAPL1   | AK4P3       |
| CDH17               | PTN      | ATP1B2      |
| CDKN1A              | RBP2     | DNASE1L2    |
| CDS1                | REEP1    | HHIPL1      |
| CLDN2               | RIMBP3   | LDOC1       |
| COL12A1             | SEMA6D   | MAB21L2     |
| CREB3L1             | SERPINE2 | MT-RNR1     |
| CYP2S1              | SI       | MTURN       |
| DCHS2               | SLC1A1   | MYO1F       |
| DIO1                | SPARC    | NOTUM       |
| DMKN                | SPDYE2   | POTEJ       |
| F2RL1               | SPINT1   | PPP1R3A     |
| FMNL3               | STK39    | RELN        |
| GCNT1               | TAC3     | SVEP1       |
| GUCY2C              | TFEC     | VAMP1       |
| HEPH                | TFF2     | RANBP3L     |
| HEY1                | TINAGL1  | SAA1        |
| HSPA12A             | TMEM51   | SAA2        |
| ISX                 | TRIM2    | SIAH3       |
| KIAA1671            | TRIM67   | SLC23A1     |
| LRP2                | TRIM9    | SLPI        |
| MAGEA11             | UNC93A   | SMPD3       |
| MALRD1              | ZNF730   | WWC3        |
| MITF                |          | ZMAT4       |
| MUC13               |          |             |
| MUC3A               |          |             |
| MVP                 |          |             |
| NODAL               |          |             |
| NOX1                |          |             |
| PARM1               |          |             |
| PLEKHB1             |          |             |
| PLG                 |          |             |
| PODXL               |          |             |
| PPP1R14A            |          |             |
| PRDM1               |          |             |

**Table S3. List of genes commonly regulated by the expression of CRABP1 or 2**

| Huh7- CRABP1 or 2 |                  |                 |
|-------------------|------------------|-----------------|
| Up                |                  | Down            |
| BCL2L10           | RNF144A          | ASGR1           |
| C1orf140          | RTN1             | C4A             |
| CES1              | SHE              | CCNY            |
| CHRNA1            | SLFN13           | CDA             |
| CMPK2             | SMARCA2          | DBNDD2          |
| COL14A1           | SNCAIP           | EGF             |
| COL2A1            | SRSF12           | F12             |
| CTSE              | TMCC3            | F2RL2           |
| DENND2A           | TMEM130          | FTCD            |
| DPYSL3            | TPD52L1          | GC              |
| EGLN3             | TSPAN12          | GFRA1           |
| ELMO1             | TSPAN5           | LURAP1L         |
| EPCAM             | TUBB8P12         | NEAT1           |
| ESRRG             | TUBBP5           | PLIN4           |
| FAM134B           | TUSC3            | RAB4B-<br>EGLN2 |
| FREM1             | USP44            | RANBP3L         |
| FYN               | ZNF511-<br>PRAP1 | SAA1            |
| GPRIN3            |                  | SAA2            |
| HUNK              |                  | SIAH3           |
| INHBB             |                  | SLC23A1         |
| IP6K3             |                  | SLPI            |
| KCNJ8             |                  | SMPD3           |
| KCNK2             |                  | WWC3            |
| KIF7              |                  | ZMAT4           |
| KRT19             |                  |                 |
| LFNG              |                  |                 |
| MRGPRF            |                  |                 |
| OSBPL10           |                  |                 |
| PBX1              |                  |                 |
| PDX1              |                  |                 |
| PITX2             |                  |                 |
| PLEKHA6           |                  |                 |
| PRNP              |                  |                 |
| PTPN22            |                  |                 |
